# Supplementary material
Source: publisher figshare collection journal article supplement (https://sage.figshare.com/ndownloader/files/20293602)
Supplement: Supplementary file 1 [file 20293602]

## APPENDIX

### Description of Reviewed Articles

| <b>Author</b>         | <b>Article</b>                                                                    | <b>Participants (Age = years;<br/>Gender = n; Type of cancer =<br/>n)</b>                                                                                                                                                                     | <b>Study<br/>Design</b> | <b>Evaluation Tools Used</b>                                     |
|-----------------------|-----------------------------------------------------------------------------------|-----------------------------------------------------------------------------------------------------------------------------------------------------------------------------------------------------------------------------------------------|-------------------------|------------------------------------------------------------------|
| Aznar et al.,<br>2006 | Physical activity during<br>treatment in children with<br>leukemia: a pilot study | <b>N</b> = 14<br><br><b>Age</b> = Experimental 5.7 (1.1) and<br>Control 5.6 (1.3)<br><br><b>Gender</b> = M (8) and F (6)<br><br><b>Type of cancer</b> = ALL<br><br><b>Point on cancer continuum</b> =<br>Last phase of maintenance<br>therapy | Quasi-<br>experimental  | 1. CHIP - CE<br><br>2. MTI Actigraph (uniaxial<br>accelerometer) |
| Bogg et al.,<br>2015  | Feasibility of an inpatient<br>exercise intervention for<br>children undergoing   | <b>N</b> = 14<br><br><b>Age</b> = 10.8 (4.2)<br><br><b>Gender</b> = M (8) and F (6)                                                                                                                                                           | Pre-<br>experimental    | 1. PedsQL MFS<br><br>2. PedsQL 3.0 Cancer Module                 |

|                    |                                                                                                                                                                                                               |                                                                                                                                                                                                                    |                      |                                                                                                                                                                                                                                        |
|--------------------|---------------------------------------------------------------------------------------------------------------------------------------------------------------------------------------------------------------|--------------------------------------------------------------------------------------------------------------------------------------------------------------------------------------------------------------------|----------------------|----------------------------------------------------------------------------------------------------------------------------------------------------------------------------------------------------------------------------------------|
|                    | hematopoietic stem cell transplant                                                                                                                                                                            | <b>Type of cancer =</b><br>leukemia/lymphoma (11) and other (3)<br><br><b>Point on cancer continuum =</b><br>On treatment during hospitalization of undergoing stem cell transplant                                |                      |                                                                                                                                                                                                                                        |
| Braam et al., 2010 | Design of the Quality of Life in Motion (QLIM) study: a randomized controlled trial to evaluate the effectiveness and cost-effectiveness of a combined physical exercise and psychosocial training program to | <b>N = 100</b><br><br><b>Age = 8-18</b> at time of recruitment<br><br><b>Gender = M and F</b><br><br><b>Type of cancer = any</b> malignancy<br><br><b>Point on cancer continuum = &lt;</b> 12 months off treatment | RCT - Study Protocol | 1. Actical 2.1 Accelerometer<br>2. Physical Activity Diary<br>3. PedsQL MFS<br>4. PedsQL 4.0 Generic Core<br>5. PedsQL 3.0 Cancer Module<br>5. CDI - Children's Depression Inventory<br>6. CBCL - Self-Perception Profile for Children |

|                                   |                                                                                                                    |                                                                                                                                                                                                                                 |                         |                                                                                                                                                                                                                                   |
|-----------------------------------|--------------------------------------------------------------------------------------------------------------------|---------------------------------------------------------------------------------------------------------------------------------------------------------------------------------------------------------------------------------|-------------------------|-----------------------------------------------------------------------------------------------------------------------------------------------------------------------------------------------------------------------------------|
|                                   | improve physical fitness<br>in children with cancer                                                                |                                                                                                                                                                                                                                 |                         | 7. CBSA - Self-Perception<br>Profile for Adolescence<br>8. CBCL- Child Behavior<br>Checklist<br>9. YSR - Youth Self-Report                                                                                                        |
| Chamorro-<br>Viña et al.,<br>2012 | EXERCISE in pediatric<br>autologous stem cell<br>transplant patients: a<br>randomized controlled<br>trial protocol | <b>N</b> = 24<br><br><b>Age</b> = 5-18 at time of recruitment<br><br><b>Gender</b> = M and F<br><br><b>Type of cancer</b> = Allogenic stem<br>cell treatment patients<br><br><b>Point on cancer continuum</b> =<br>On treatment | RCT - Study<br>Protocol | 1. Log books for activity<br>2. Triaxial Accelerometers<br>3. PedsQL 4.0 Generic Core<br>4. BASC-2 - Behavior<br>Assessment System for Children<br>as a parent proxy<br>5. PedsQL MFS<br>6. TUG-3m<br>7. PedsQL 3.0 Cancer Module |
| Chung et al.,<br>2015             | Sustainability of an<br>Integrated Adventure-                                                                      | <b>N</b> = 71<br><br><b>Age</b> = 12.6 +/- 2.1                                                                                                                                                                                  | RCT                     | 1. CUHK-PARCY<br>2. PASCQ                                                                                                                                                                                                         |

|                           |                                                                                                                                                |                                                                                                                                                                                                              |                    |                                                                                                                           |
|---------------------------|------------------------------------------------------------------------------------------------------------------------------------------------|--------------------------------------------------------------------------------------------------------------------------------------------------------------------------------------------------------------|--------------------|---------------------------------------------------------------------------------------------------------------------------|
|                           | Based Training and Health Education Program to Enhance Quality of Life Among Chinese Childhood Cancer Survivors: A Randomized Controlled Trial | <b>Gender</b> = M (37) and F (34)<br><b>Type of cancer</b> = leukemia/lymphoma (53) and other (18)<br><b>Point on cancer continuum</b> = within 5 years of treatment completion (3 were longer than 5 years) |                    | 3. PASE<br>4. PedsQL                                                                                                      |
| Cortés-Reyes et al., 2013 | The effect of game-based exercise on infant acute lymphocytic leukemia patients                                                                | <b>N</b> = 7<br><b>Age</b> = 9.0 (2.1)<br><b>Gender</b> = M (3) and F (4)<br><b>Type of cancer</b> = ALL<br><b>Point on cancer continuum</b> = Treatment within 2 months                                     | Quasi-experimental | 1. Motor Skills - gross motor function measurement (GMFM) to classify patients seated, bipedal, walking, running, jumping |
| Dijk-Lokkart et al., 2016 | Effects of a combined physical and psychosocial                                                                                                | <b>N</b> = 68<br><b>Age</b> = Experimental 10.0 (3.0)                                                                                                                                                        | RCT                | 1. PedsQL 4.0 Generic Core<br>2. PedsQL 3.0 Cancer Module                                                                 |

|                     |                                                                                                                                                   |                                                                                                                                                                                                                                                     |                  |                                                                                                                                                       |
|---------------------|---------------------------------------------------------------------------------------------------------------------------------------------------|-----------------------------------------------------------------------------------------------------------------------------------------------------------------------------------------------------------------------------------------------------|------------------|-------------------------------------------------------------------------------------------------------------------------------------------------------|
|                     | intervention program for childhood cancer patients on quality of life and psychosocial functioning: results of the QLIM randomized clinical trial | and Control 12.6 (3.1)<br><b>Gender</b> = M (36) and F (32)<br><b>Type of cancer</b> = Leukemia/lymphoma (20), brain tumor/CNS tumor (2), solid tumor (8)<br><b>Point on cancer continuum</b> = during treatment or within one year after treatment |                  | 3. PedsQL MFS<br>4. Child Behavioral Checklist<br>5. Children's Depression Inventory<br>6. Dutch Self Perception Profile for children and adolescents |
| Diorio et al., 2015 | A pilot study to evaluate the feasibility of individualized yoga for inpatient children receiving intensive chemotherapy                          | <b>N</b> = 11<br><b>Age</b> = 14.0 (7.7-16.4)<br><b>Gender</b> = M (6) and F (5)<br><b>Type of cancer</b> = Leukemia/lymphoma (8) and other (3)                                                                                                     | Pre-experimental | 1. PedsQL 4.0 Generic<br>2. PedsQL MFS<br>3. PedsQL 3.0 Acute Cancer Module                                                                           |

|                         |                                                                                                                              |                                                                                                                                                                                               |                  |               |
|-------------------------|------------------------------------------------------------------------------------------------------------------------------|-----------------------------------------------------------------------------------------------------------------------------------------------------------------------------------------------|------------------|---------------|
|                         |                                                                                                                              | <b>Point on cancer continuum =</b><br>2.2 months since diagnosis                                                                                                                              |                  |               |
| Esbenshade et al., 2014 | Feasibility and initial effectiveness of home exercise during maintenance therapy for childhood acute lymphoblastic leukemia | <b>N = 17</b><br><b>Age = 7. 4 (2.0)</b><br><b>Gender = M (12) and F (5)</b><br><b>Type of cancer = ALL</b><br><b>Point on cancer continuum =</b><br>At least 6 months of treatment remaining | Pre-experimental | 1. BOT-2      |
| Geyer et al., 2011      | Feasibility study: the effect of therapeutic yoga on quality of life in children hospitalized with cancer                    | <b>N = 6</b><br><b>Age = 11.6 ( 5.3)</b><br><b>Gender = M (1) and F (5)</b><br><b>Type of cancer = ALL (3), sarcoma (1), AML (1) and other (1)</b><br><b>Point on cancer continuum =</b>      | Pre-experimental | 1. PedsQL 4.0 |

|                      |                                                                                                                                                                   |                                                                                                                                                                                                 |                  |                                                                                                                              |
|----------------------|-------------------------------------------------------------------------------------------------------------------------------------------------------------------|-------------------------------------------------------------------------------------------------------------------------------------------------------------------------------------------------|------------------|------------------------------------------------------------------------------------------------------------------------------|
|                      |                                                                                                                                                                   | In-treatment but not in the induction phase                                                                                                                                                     |                  |                                                                                                                              |
| Gilliam et al., 2011 | A Pilot Study Evaluation of a Web-Based Token Economy to Increase Adherence with a Community-Based Exercise Intervention in Child and Adolescent Cancer Survivors | <b>N</b> = 12<br><b>Age</b> = 12.8 (3.6)<br><b>Gender</b> = M (6) and F (6)<br><b>Type of cancer</b> = ALL (7) and other (5)<br><b>Point on cancer continuum</b> = Within 1 year post-treatment | Pre-experimental | 1. Web-based exercise logs<br>2. Sit-To-Stand Test<br>3. Lateral Step-up test<br>4. PedsQL4.0 Generic Core                   |
| Götte et al., 2014   | Comparison of self-reported physical activity in children and adolescents before and during cancer treatment                                                      | <b>N</b> = 130<br><b>Age</b> = 12.2 (4.7)<br><b>Gender</b> = M (79) and F (51)<br><b>Type of cancer</b> = Leukemia (44), bone tumor (37), lymphoma (14), brain tumor (8) and other (27)         | Cross-sectional  | 1. German Health Interview and Examination Survey for Children and Adolescents (KiGGS) in a modified cancer specific version |

|                         |                                                                                                                                                                                                                           |                                                                                                                                                                                                                    |     |                                                                                                                                    |
|-------------------------|---------------------------------------------------------------------------------------------------------------------------------------------------------------------------------------------------------------------------|--------------------------------------------------------------------------------------------------------------------------------------------------------------------------------------------------------------------|-----|------------------------------------------------------------------------------------------------------------------------------------|
|                         |                                                                                                                                                                                                                           | <b>Point on cancer continuum = 3</b><br>months post-diagnosis                                                                                                                                                      |     |                                                                                                                                    |
| Hartman et al.,<br>2009 | A randomized trial<br>investigating an exercise<br>program to prevent<br>reduction of bone mineral<br>density and impairment<br>of motor performance<br>during treatment for<br>childhood acute<br>lymphoblastic leukemia | <b>N = 51</b><br><b>Age</b> = Experimental 5.3 (1.3-<br>15.6) and Control 6.2 (1.7-17.1)<br><b>Gender</b> = M (30) and F (21)<br><b>Type of cancer</b> = ALL<br><b>Point on cancer continuum</b> =<br>At diagnosis | RCT | 1. Dutch Bayley scale of Infant<br>Development (BSID-II)<br>2. M-ABC                                                               |
| Hinds et al.,<br>2007   | Clinical field testing of an<br>enhanced-activity<br>intervention in<br>hospitalized children with<br>cancer                                                                                                              | <b>N = 29</b><br><b>Age</b> = Experimental 13.8 (2.6)<br>and Control 11.9 (3.2)<br><b>Gender</b> = M (12) and F (17)<br><b>Type of cancer</b> = solid tumor                                                        | RCT | 1.FS-C - Fatigue Scale for 7-12<br>years old<br>2. FS-A - Fatigue Scale for 13- to<br>18 years old<br>3. FS-P - The Fatigue Scale: |



|                          |                                                                                                                                      |                                                                                                                                                                                                                                    |                             |                                                                                                                   |
|--------------------------|--------------------------------------------------------------------------------------------------------------------------------------|------------------------------------------------------------------------------------------------------------------------------------------------------------------------------------------------------------------------------------|-----------------------------|-------------------------------------------------------------------------------------------------------------------|
|                          |                                                                                                                                      | (25) and leukemia (4)<br><br><b>Point on cancer continuum =</b><br><br>On treatment                                                                                                                                                |                             | Parent Version<br><br>4. FS-S - The Fatigue Scale Staff<br><br>Version                                            |
| Kauhanen et al. 2014     | Active video games to promote physical activity in children with cancer: a randomized clinical trial with follow-up                  | <b>N</b> = 40<br><br><b>Age</b> = 3-16 at time of recruitment<br><br><b>Gender</b> = M and F<br><br><b>Type of cancer</b> = ALL or cancer outside CNS<br><br><b>Point on cancer continuum =</b><br><br>Within week after diagnosis | RCT - Study<br><br>Protocol | 1. M-ABC<br><br>2. Three-dimensional Accelerometer (FitBit)<br><br>3. PedsQL MFS<br><br>4. Leisure-time PA in MET |
| Keats & Culos-Reed, 2008 | A community-based physical activity program for adolescents with cancer (project TREK): program feasibility and preliminary findings | <b>N</b> = 10<br><br><b>Age</b> = 16.2 (1.6)<br><br><b>Gender</b> = M (2) and F (8)<br><br><b>Type of cancer</b> = Lymphoma (4), leukemia (4), CNS tumor (1) and other (1)                                                         | Pre-experimental            | 1. PedsQL 4.0<br><br>2. PedsQL-MFS<br><br>3. GLTEQ                                                                |

|                         |                                                                                                                                                                                |                                                                                                                                                                                                                                          |                     |                                                                                                                                                                                                    |
|-------------------------|--------------------------------------------------------------------------------------------------------------------------------------------------------------------------------|------------------------------------------------------------------------------------------------------------------------------------------------------------------------------------------------------------------------------------------|---------------------|----------------------------------------------------------------------------------------------------------------------------------------------------------------------------------------------------|
|                         |                                                                                                                                                                                | <b>Point on cancer continuum =</b><br>62.5 months post-diagnosis                                                                                                                                                                         |                     |                                                                                                                                                                                                    |
| Kesting et al.,<br>2015 | Motor Performance After<br>Treatment for Pediatric<br>Bone Tumors                                                                                                              | <b>N = 21</b><br><br><b>Age = 15.2 (2.1)</b><br><br><b>Gender = M (13) and F (8)</b><br><br><b>Type of cancer = Bone cancer</b><br><br><b>Point on cancer continuum =</b><br>Within 24 months of follow-up<br>after treatment completion | Cross-<br>sectional | 1. MOON (test for <b>motor</b><br>performance in <b>oncology</b> ) Test                                                                                                                            |
| Li et al., 2013         | Effectiveness of an<br>integrated adventure-<br>based training and health<br>education program in<br>promoting regular<br>physical activity among<br>childhood cancer survivor | <b>N = 71</b><br><br><b>Age = Experimental 12.5 (2.2)</b><br>and Control 12.8 (2.1)<br><br><b>Gender = M (37) and F (34)</b><br><br><b>Type of cancer = Leukemia (35),</b><br>lymphoma (18), brain tumor (4),<br>bone tumor (8) and      | RCT                 | 1. Physical activity Rating for<br>Children and Youth (CUHK-<br>PARCY) (Chinese University of<br>Hong Kong)<br><br>2. PA Stages of Change<br>Questionnaire (PASCQ) (used<br>with Chinese children) |

|                       |                                                                                           |                                                                                                                                                                                                           |                 |                                                                                                            |
|-----------------------|-------------------------------------------------------------------------------------------|-----------------------------------------------------------------------------------------------------------------------------------------------------------------------------------------------------------|-----------------|------------------------------------------------------------------------------------------------------------|
|                       |                                                                                           | neuroblastoma (6)<br><br><b>Point on cancer continuum =</b><br><br>Completed treatment at least 6 months prior                                                                                            |                 | 3. PA Self-Efficacy (PASE)<br><br>(used with Chinese children)<br><br>4. PedsQL 4.0                        |
| Marchese et al., 2004 | Effects of physical therapy intervention for children with acute lymphoblastic leukemia   | <b>N= 28</b><br><br><b>Age=</b> Experimental 8.6 and Control 7.6<br><br><b>Gender=</b> M (20) and F (8)<br><br><b>Type of cancer=</b> ALL<br><br><b>Point on cancer continuum=</b> In maintenance therapy | RCT             | 1. PedsQL 3.0<br><br>2. TUDS                                                                               |
| Norris et al., 2010   | Families of young pediatric cancer survivors: a cross-sectional survey examining physical | <b>N = 27</b><br><br><b>Age =</b> Survivors 15.5 (2.2) and Siblings 13.8 (2.3)<br><br><b>Gender =</b> M (15) and F (12)<br><br><b>Type of cancer =</b> Leukemia (7),                                      | Cross-sectional | 1. GLTEQ<br><br>2. Total physical activity metabolic equivalent (METs) hours per week<br><br>3. PedsQL 4.0 |

|                     |                                                                                                                                                  |                                                                                                                                                                                                                                                                                       |              |                                                                                                                                                                                                                                                                                           |
|---------------------|--------------------------------------------------------------------------------------------------------------------------------------------------|---------------------------------------------------------------------------------------------------------------------------------------------------------------------------------------------------------------------------------------------------------------------------------------|--------------|-------------------------------------------------------------------------------------------------------------------------------------------------------------------------------------------------------------------------------------------------------------------------------------------|
|                     | activity behavior and health-related quality of life.                                                                                            | CNS tumors (3), lymphoma (2), other (5)<br><b>Point on cancer continuum</b> = Aged 10-17 with a previous cancer diagnosis                                                                                                                                                             |              |                                                                                                                                                                                                                                                                                           |
| Paxton et al., 2010 | Associations between leisure-time physical activity and health-related quality of life among adolescent and adult survivors of childhood cancers | <b>N</b> = 94 (adolescents)<br><b>Age</b> = 14.3 (1.8)<br><b>Gender</b> = M (48) and F (46)<br><b>Type of cancer</b> = CNS tumors (40), lymphoma (40) and leukemia (14)<br><b>Point on cancer continuum</b> = Previous diagnosis with no evidence of recurrent or progressive disease | Case-control | <ol style="list-style-type: none"> <li>1. Pediatric Quality of Life 4.0 Generic Core (PedsQL)</li> <li>2. PedsQL 3.0 Cancer Module</li> <li>3. PedsQL Multidimensional Fatigue Scale Questionnaires (PedsQL MFS)</li> <li>4. Godin Leisure-Time Exercise Questionnaire (GLTEQ)</li> </ol> |

|                          |                                                                                                                             |                                                                                                                                                                                                                                                        |                        |                                                                                |
|--------------------------|-----------------------------------------------------------------------------------------------------------------------------|--------------------------------------------------------------------------------------------------------------------------------------------------------------------------------------------------------------------------------------------------------|------------------------|--------------------------------------------------------------------------------|
| Perondi et al.,<br>2012  | Effects of a combined<br>aerobic and strength<br>training program in youth<br>patients with acute<br>lymphoblastic leukemia | <b>N = 6</b><br><br><b>Age = 10.33 (4.13)</b><br><br><b>Gender = M (2) and F (4)</b><br><br><b>Type of cancer = ALL</b><br><br><b>Point on cancer continuum = &gt;</b><br>6 months post treatment                                                      | Quasi-<br>experimental | 1. PedsQL                                                                      |
| Piscione et al.,<br>2012 | Physical functioning in<br>pediatric survivors of<br>childhood posterior fossa<br>brain tumors                              | <b>N = 30</b><br><br><b>Age = 11.4 (4.1)</b><br><br><b>Gender = M (15) and F (15)</b><br><br><b>Type of cancer = Brain tumor</b><br><br><b>Point on cancer continuum =</b><br>At least 1 year after surgery with<br>no maximum time since<br>diagnosis | Cross-<br>sectional    | 1. Bruininks-Oseretsky Test of<br>Motor Proficiency, Second<br>Edition (BOT-2) |

|                                 |                                                                                           |                                                                                                                                                                                      |                  |                                                                         |
|---------------------------------|-------------------------------------------------------------------------------------------|--------------------------------------------------------------------------------------------------------------------------------------------------------------------------------------|------------------|-------------------------------------------------------------------------|
| Reinders-Messelink et al., 1999 | Motor performance of children during treatment for acute lymphoblastic leukemia           | <b>N</b> = 27<br><b>Age</b> = Experimental 5.8 and Control 5.5<br><b>Gender</b> = M (18) and F (9)<br><b>Type of cancer</b> = ALL<br><b>Point on cancer continuum</b> = On treatment | Cross-sectional  | 1. Movement Assessment Battery (M-ABC)                                  |
| Rosenhagen et al., 2011         | Implementation of structured physical activity in the pediatric stem cell transplantation | <b>N</b> = 23<br><b>Age</b> = 15.3 (3.7)<br><b>Gender</b> = NR<br><b>Type of cancer</b> = leukemia (17) and other (6)<br><b>Point on cancer continuum</b> = On treatment             | Case-control     | 1. KINDL (self-assessment test for health-related QOL)<br>2. PedsQL MFS |
| San Juan et al., 2007           | Effects of an intrahospital exercise program                                              | <b>N</b> = 7<br><b>Age</b> = 5.1 (1.2)                                                                                                                                               | Pre-experimental | 1. Child Health and Illness Profile -- Child Edition (CHIP -            |

|                             |                                                                                         |                                                                                                                                                                                                                      |                    |                                                                           |
|-----------------------------|-----------------------------------------------------------------------------------------|----------------------------------------------------------------------------------------------------------------------------------------------------------------------------------------------------------------------|--------------------|---------------------------------------------------------------------------|
|                             | intervention for children with leukemia                                                 | <b>Gender</b> = M (4) and F (3)<br><b>Type of cancer</b> = ALL<br><b>Point on cancer continuum</b> =<br>Within 18-24 month after start of treatment. ALL in maintenance phase                                        |                    | CE/CRF)<br>2. Timed-Up-and-Go (TUG)<br>3. Timed-Up-and-Down Stairs (TUDS) |
| San Juan et al., 2010       | Benefits of Intrahospital Exercise Training after Pediatric Bone Marrow Transplantation | <b>N</b> = 16<br><b>Age</b> = Experimental 10.9 (2.8) and Control 10.9 (2.6)<br><b>Gender</b> = M (8) and F (8)<br><b>Type of cancer</b> = leukemia<br><b>Point on cancer continuum</b> = ≤ 12 months post-treatment | Quasi-experimental | 1. TUG-3m<br>2. TUG-10m<br>4.CHIP-CE,PE,AE                                |
| Soares-Miranda et al., 2013 | Physical Activity in Pediatric Cancer patients with solid tumors                        | <b>N</b> = 40<br><b>Age</b> = 4-18<br><b>Gender</b> = M and F                                                                                                                                                        | Pre-experimental   | 1. TUDS<br>2. TUG-3m<br>3. TUG-10 meters (10m)                            |

|                     |                                                                                                                                                         |                                                                                                                                                                                                                                      |                  |                                                                                                                                                        |
|---------------------|---------------------------------------------------------------------------------------------------------------------------------------------------------|--------------------------------------------------------------------------------------------------------------------------------------------------------------------------------------------------------------------------------------|------------------|--------------------------------------------------------------------------------------------------------------------------------------------------------|
|                     | (PAPEC): Trial rationale and design                                                                                                                     | <b>Type of cancer</b> = Solid tumors<br><b>Point on cancer continuum</b> =<br>On treatment                                                                                                                                           | - Study Protocol | 4. Uni-axial accelerometer (Actigraph MTI)<br>5. Child Health and Illness Profile-Child Edition, Parent Edition and Adolescent Edition (CHIP-CE,PE,AE) |
| Speyer et al., 2010 | Effect of adapted physical activity sessions in the hospital on health-related quality of life for children with cancer: A cross-over randomized trial. | <b>N</b> = 30<br><b>Age</b> = 13.6 (2.9)<br><b>Gender</b> = M (18) and F (12)<br><b>Type of cancer</b> = Hematologic malignancy (15), solid tumor (12), other (3)<br><b>Point on cancer continuum</b> =<br>In-hospital for treatment | RCT              | 1. Child Health Questionnaire (CHQ)                                                                                                                    |
| Takken et al., 2009 | Development, feasibility and efficacy of a                                                                                                              | <b>N</b> = 9<br><b>Age</b> = 9.3 (3.2)                                                                                                                                                                                               | Pre-experimental | 1. TUG-3 meters (3m)<br>2. TUDS                                                                                                                        |



|                              |                                                                                                                                                     |                                                                                                                                                                                                                            |                     |                                                                         |
|------------------------------|-----------------------------------------------------------------------------------------------------------------------------------------------------|----------------------------------------------------------------------------------------------------------------------------------------------------------------------------------------------------------------------------|---------------------|-------------------------------------------------------------------------|
|                              | community-based<br>exercise training program<br>in pediatric cancer<br>survivors                                                                    | <b>Gender</b> = M (3) and F (6)<br><b>Type of cancer</b> = ALL<br><b>Point on cancer continuum</b> = $\geq$<br>6 months post-treatment                                                                                     |                     |                                                                         |
| Tanir &<br>Kuguoglu,<br>2013 | Impact of exercise on<br>lower activity levels in<br>children with acute<br>lymphoblastic leukemia:<br>a randomized controlled<br>trial from Turkey | <b>N</b> = 40<br><b>Age</b> = Experimental 10.2 (1.5)<br>and Control 10.7 (1.5)<br><b>Gender</b> = M (24) and F (16)<br><b>Type of cancer</b> = ALL<br><b>Point on cancer continuum</b> =<br>Within 1 year after diagnosis | RCT                 | 1. PedsQL - 4.0<br>2. PedsQL 3.0 Cancer module<br>3. TUGS-3m<br>4. TUDS |
| van Brussel et<br>al., 2006  | Physical function and<br>fitness in long-term<br>survivors of childhood<br>leukaemia                                                                | <b>N</b> = 13<br><b>Age</b> = 15.5 (5.8)<br><b>Gender</b> = M (6) and F (7)<br><b>Type of cancer</b> = ALL                                                                                                                 | Cross-<br>sectional | 1. M-ABC                                                                |

|                       |                                                                                                                                           |                                                                                                                                                                                                        |                      |                                        |
|-----------------------|-------------------------------------------------------------------------------------------------------------------------------------------|--------------------------------------------------------------------------------------------------------------------------------------------------------------------------------------------------------|----------------------|----------------------------------------|
|                       |                                                                                                                                           | <b>Point on cancer continuum =</b><br>On treatment                                                                                                                                                     |                      |                                        |
| Woods et al.,<br>2013 | An Evaluation of<br>Psychosocial Outcomes<br>for Children and<br>Adolescents Attending a<br>Summer Camp for Youth<br>with Chronic Illness | <b>N</b> = 102<br><br><b>Age</b> = 13.1 (2.4)<br><br><b>Gender</b> = M (56) and F (46)<br><br><b>Type of cancer</b> = NR (38<br>diagnosed with cancer)<br><br><b>Point on cancer continuum =</b><br>NR | Pre-<br>experimental | 1. PedsQL<br>2. Children's Hope Scale  |
| Wurz et al.,<br>2014  | The feasibility and<br>benefits of a 12-week<br>yoga intervention for<br>pediatric cancer out-<br>patients                                | <b>N</b> = 8<br><br><b>Age</b> = 11.9 (4.3)<br><br><b>Gender</b> = M (4) and F (4)<br><br><b>Type of cancer</b> =<br>leukemia/lymphoma (4), CNS (2)<br>and other (2)                                   | Pre-<br>experimental | 1. PedsQL 4.0<br>2. TUG-3m<br>3. GLTEQ |

|                             |                                                                                                                                                             |                                                                                                                                                                                                                                                                    |                    |                                                                                                                                              |
|-----------------------------|-------------------------------------------------------------------------------------------------------------------------------------------------------------|--------------------------------------------------------------------------------------------------------------------------------------------------------------------------------------------------------------------------------------------------------------------|--------------------|----------------------------------------------------------------------------------------------------------------------------------------------|
|                             |                                                                                                                                                             | <b>Point on cancer continuum =</b><br>Out-patient on treatment                                                                                                                                                                                                     |                    |                                                                                                                                              |
| Yildiz, Duger & Uckan, 2016 | Investigation of the Effects of an Exercise Program on Physical Functions and Activities of Daily Life in Pediatric Hematopoietic Stem Cell Transplantation | <b>N = 22</b><br><br><b>Age=</b> Experimental 9.3 (3.4) and Control 6.7 (3.0)<br><br><b>Gender =</b> NR<br><br><b>Type of cancer =</b> leukemia/lymphoma (8) and other (14)<br><br><b>Point on cancer continuum =</b> On treatment undergoing stem cell transplant | Quasi-experimental | 1. Time needed to stand up from bed rest exam<br><br>2. TUG-3m<br><br>3. TUDS<br><br>4. WeeFIM - functional independent measure for children |
| Yeh et al., 2011            | A pilot study to examine the feasibility and effects                                                                                                        | <b>N = 22</b><br><br><b>Age =</b> Experimental 11.0 (3.6)                                                                                                                                                                                                          | Quasi-experimental | 1. PedsQL MFS<br><br>2. Physical Activity Log                                                                                                |

|  |                                                                                                   |                                                                                                                                                                  |  |  |
|--|---------------------------------------------------------------------------------------------------|------------------------------------------------------------------------------------------------------------------------------------------------------------------|--|--|
|  | of a home-based aerobic program on reducing fatigue in children with acute lymphoblastic leukemia | and Control 12.5 (3.9)<br><br><b>Gender</b> = M (12) and F (10)<br><br><b>Type of cancer</b> = ALL<br><br><b>Point on cancer continuum</b> =<br><br>On treatment |  |  |
|--|---------------------------------------------------------------------------------------------------|------------------------------------------------------------------------------------------------------------------------------------------------------------------|--|--|

NR = Not reported; NA = Not applicable
